# Supplementary material
Source: PubMed Central journal article supplement (PMC2672555)
Supplement: 0810665106_0810665106SI.pdf [file 0810665106_0810665106SI.pdf]

# Supporting Information

Bix et al. 10.1073/pnas.0810665106

**Table S1. Package and gaze zone details**

| Package no. | No. of principal display panels* | Face(s) where zone appears                                                 | Gaze zone      | Surface area of the gaze zone, mm <sup>2</sup> | No. of typographical characters in the gaze zone |
|-------------|----------------------------------|----------------------------------------------------------------------------|----------------|------------------------------------------------|--------------------------------------------------|
| 1           | 2                                | Both PDPs                                                                  | CR warning     | 140                                            | 44                                               |
|             |                                  | 1 end flap                                                                 | TE warning     | 473                                            | 90                                               |
|             |                                  | Both PDPs                                                                  | Strength       | 203                                            | 11                                               |
|             |                                  | Both PDPs                                                                  | Brand name     | 990                                            | 10                                               |
|             |                                  | Vertical: 2 faces                                                          | Drug facts box | 5,624                                          | 1,788                                            |
| 2           | 1                                | PDP                                                                        | CR warning     | 120                                            | 44                                               |
|             |                                  | 1 end flap                                                                 | TE warning     | 284                                            | 90                                               |
|             |                                  | PDP                                                                        | Strength       | 392                                            | 8                                                |
|             |                                  | PDP                                                                        | Brand name     | 918                                            | 8                                                |
|             |                                  | Horizontal: 3 faces                                                        | Drug facts box | 8,989                                          | 2,898                                            |
| 3           | 2                                | Both PDPs                                                                  | CR warning     | 400                                            | 44                                               |
|             |                                  | In bolded red font within the drug facts box                               | TE warning     | 560                                            | 84                                               |
|             |                                  | Both PDPs                                                                  | Strength       | 273                                            | 13                                               |
|             |                                  | Both PDPs                                                                  | Brand name     | 1,095                                          | 7                                                |
|             |                                  | Horizontal: 2 faces                                                        | Drug facts box | 5,200                                          | 1,623                                            |
| 4           | 2                                | 1 PDP                                                                      | CR warning     | 329                                            | 44                                               |
|             |                                  | In bolded blue font within the drug facts box (surrounding text is blue)   | TE warning     | 546                                            | 97                                               |
|             |                                  | Both PDPs                                                                  | Strength       | 136                                            | 13                                               |
|             |                                  | Both PDPs                                                                  | Brand name     | 2,194                                          | 9                                                |
|             |                                  | Vertical: 2 faces                                                          | Drug facts box | 7,112                                          | 2,267                                            |
| 5           | 1                                | PDP                                                                        | CR warning     | 341                                            | 44                                               |
|             |                                  | In bolded black font within the drug facts box (surrounding text is black) | TE warning     | 320                                            | 63                                               |
|             |                                  | PDP                                                                        | Strength       | 180                                            | 15                                               |
|             |                                  | PDP                                                                        | Brand name     | 1,691                                          | 12                                               |
|             |                                  | Back panel                                                                 | Drug facts box | 8,340                                          | 2,065                                            |

\*Principal display panel (PDP) is "that part of a label that is most likely to be displayed, presented, shown or examined under norm and customary conditions of display for retail sale" [Fair Packaging and Labeling Act of 1966. Public Law 89-755. Title 15; Chapter 39].
